# Supplementary material for: FAPI PET versus FDG PET, CT or MRI for Staging Pancreatic-, Gastric- and Cholangiocarcinoma: Systematic Review and Head-to-Head Comparisons of Diagnostic Performances
Source: MDPI journal article supplement (doi:10.3390/diagnostics12081958), 2022-08-12
Supplement: s1 [file s1]

Table S1. Sens analysis; as reported in the original manuscript or calculated based on published raw data.

| YEAR | AUTHOR                      | TYPE OF<br>CANCER | <u>PATIENT-WISE ANALYSIS</u><br>sensitivity of FAPI PET for<br>T/N/M/PC<br>(confirmed by reference<br>standard) | <u>PATIENT-WISE ANALYSIS</u><br>sensitivity of FDG PET or<br>CECT/MRI for T/N/M/PC<br>(confirmed by reference<br>standard) | <u>LESION-WISE ANALYSIS</u><br>sensitivity of FAPI PET for<br>T/N/M/PC<br>(confirmed by reference<br>standard) | <u>LESION-WISE<br/>ANALYSIS</u><br>sensitivity of FDG<br>PET/CT/MRI for<br>T/N/M/PC<br>(confirmed by reference<br>standard) |
|------|-----------------------------|-------------------|-----------------------------------------------------------------------------------------------------------------|----------------------------------------------------------------------------------------------------------------------------|----------------------------------------------------------------------------------------------------------------|-----------------------------------------------------------------------------------------------------------------------------|
| 2021 | Chen, H., et al.<br>[10]    | P                 | -                                                                                                               | -                                                                                                                          | -                                                                                                              | -                                                                                                                           |
|      |                             | G                 | -                                                                                                               | -                                                                                                                          | -                                                                                                              | -                                                                                                                           |
|      |                             | Ch                | -                                                                                                               | -                                                                                                                          | -                                                                                                              | -                                                                                                                           |
| 2021 | Guo, W., et al.<br>[11]     | Ch                | 100% (7/7) / - / - / -                                                                                          | PET 57% (4/7) / - / - / -<br>CECT 100% (7/7) / - / - / -<br>MRI 100% (7/7) / - / - / -                                     | - / - / 85% (41/48) / -                                                                                        | PET - / - / 52% (25/48) / -<br>CECT not performed<br>MRI - / - / 100% (48/48) / -                                           |
| 2021 | Pang, Y., et al.<br>[12]    | G                 | 100% (11/11) / - / - / -                                                                                        | 36% (4/11) / - / - / -                                                                                                     | n.p.                                                                                                           | n.p.                                                                                                                        |
| 2021 | Zhao, L., et al.<br>[17]    | P                 | - / - / - / 100% (6/6)                                                                                          | - / - / - / 67% (4/6)                                                                                                      | -                                                                                                              | -                                                                                                                           |
|      |                             | G                 | - / - / - / 100% (13/13)                                                                                        | - / - / - / 54% (7/13)                                                                                                     |                                                                                                                |                                                                                                                             |
| 2021 | Qin, C., et al.<br>[13]     | G                 | 100% (14/14) / - / - / -                                                                                        | 71% (10/14) / - / - / -                                                                                                    | n.p.                                                                                                           | n.p.                                                                                                                        |
| 2021 | Rohrich, M., et<br>al. [14] | P                 | -                                                                                                               | PET n.p.<br>CECT -                                                                                                         | n.p.                                                                                                           | n.p.                                                                                                                        |
| 2021 | Shi, X., et al.<br>[15]     | Ch                | 100% (3/3) / - / - / -                                                                                          | 100% (3/3) / - / - / -                                                                                                     | 100% (4/4) / - / - / -                                                                                         | 100% (4/4) / - / - / -                                                                                                      |
| 2021 | Shi, X., et al.<br>[16]     | G                 | - / - / - / -                                                                                                   | PET n.p.                                                                                                                   | -                                                                                                              | PET n.p.                                                                                                                    |
|      |                             | Ch                | 100% (2/2) / - / - / -                                                                                          | CECT -<br>MRI -                                                                                                            |                                                                                                                | CECT -<br>MRI -                                                                                                             |
| 2021 | Pang, Y., et al.<br>[18]    | P                 | 100% (26/26) / - / - / -                                                                                        | PET 73% (19/26) / - / - / -<br>CECT - / - / - / -                                                                          | - / 82% / bone 92%, visceral<br>88% / -                                                                        | PET - / 59% / bone 44%,<br>visceral 48% / -<br>CECT - / - / - / -                                                           |

|      |                           |   |                                               |                                           |   |   |
|------|---------------------------|---|-----------------------------------------------|-------------------------------------------|---|---|
| 2021 | Kuten, J., et al.<br>[19] | G | 100% (10/10) / 100% (2/2) / - /<br>100% (5/5) | 50% (5/10) / 100% (2/2) / - /<br>0% (0/5) | - | - |
|------|---------------------------|---|-----------------------------------------------|-------------------------------------------|---|---|

- not reported for the diseases of interest separately  
*n.p. analyses not performed in the study*

Table S2. SUVmax and TBRmax values for FAPI and FDG

| Year | Author           | TYPE OF<br>CANCER | <u>PATIENT-WISE<br/>ANALYSIS</u><br>median SUVmax for<br>T/N/M/PC (nr. of<br>patients), and<br>(TBR) for FAPI | <u>PATIENT-WISE<br/>ANALYSIS</u><br>median SUVmax for<br>T/N/M/PC (nr. of<br>patients), and<br>(TBR) for FDG | <u>LESION-WISE<br/>ANALYSIS</u><br>median SUVmax for<br>T/N/M/PC (nr. of<br>patients), and<br>(TBR) for FAPI | <u>LESION-WISE<br/>ANALYSIS</u><br>median SUVmax for<br>T/N/M/PC (nr. of<br>patients), and<br>(TBR) for FDG |
|------|------------------|-------------------|---------------------------------------------------------------------------------------------------------------|--------------------------------------------------------------------------------------------------------------|--------------------------------------------------------------------------------------------------------------|-------------------------------------------------------------------------------------------------------------|
| 2021 | Chen, H. [10]    | P                 | 24.8 (1) / - / - / -<br>(- / - / - / -)                                                                       | 2.7 (1) / - / - / -<br>(- / - / - / -)                                                                       | -                                                                                                            | -                                                                                                           |
|      |                  | G                 | 14.1 (5) / - / - / -<br>(- / - / - / -)                                                                       | 2.7 (5) / - / - / -<br>(- / - / - / -)                                                                       | -                                                                                                            | -                                                                                                           |
|      |                  | Ch                | 10.3 (1) / - / - / -<br>(- / - / - / -)                                                                       | 1.8 (1) / - / - / -<br>(- / - / - / -)                                                                       | -                                                                                                            | -                                                                                                           |
| 2021 | Guo, W. [11]     | Ch                | 16.5 (7) / - / - / -<br>(7.0 / - / - / -)                                                                     | 4.2 (7) / - / - / -<br>(1.5 / - / - / -)                                                                     | n.p.                                                                                                         | n.p.                                                                                                        |
| 2021 | Pang, Y. [12]    | G                 | 12.7 (11) / - / - / -<br>(- / - / - / -)                                                                      | 3.7 (4) / - / - / -<br>(- / - / - / -)                                                                       | n.p.                                                                                                         | n.p.                                                                                                        |
| 2021 | Zhao, L. [17]    | P                 | - / - / - / 7.8 (6)<br>(- / - / - / -)                                                                        | - / - / - / 3.3 (6)<br>(- / - / - / -)                                                                       | -                                                                                                            | -                                                                                                           |
|      |                  | G                 | - / - / - / 8.1 (13)<br>(- / - / - / -)                                                                       | - / - / - / 3.4 (13)<br>(- / - / - / -)                                                                      |                                                                                                              |                                                                                                             |
| 2021 | Qin, C. [13]     | G                 | 11.3 (14) / 9.9* (12) / - / 8.4<br>(10)<br>(12.4 / 10.9 / - / 9.6)                                            | 6.2 (10) / 6.6 (10) / - / 7.6<br>(4)<br>(4.0 / 4.0 / - / 5.0)                                                | - / 8.7* (45) / - / 7.6 (42)<br>(- / 9.4 / - / 8.7)                                                          | - / 6.1 (33) / - / 5.7 (14)<br>(- / 3.7 / - / 3.7)                                                          |
| 2021 | Rohrich, M. [14] | P                 | 13.4 (19) / 14.1 (19) / 7.3<br>(19) / -                                                                       | n.p.                                                                                                         | n.p.                                                                                                         | n.p.                                                                                                        |
| 2021 | Shi, X. [15]     | Ch                | 14.4 (4) / - / - / -<br>(26.5 / - / - / -)                                                                    | 9.2 (4) / - / - / -<br>(4.4 / - / - / -)                                                                     | - / - / 8.0 (17) / -<br>(- / - / 15.2 / -)                                                                   | - / - / 4.9 (17) / -<br>(- / - / 2.1 / -)                                                                   |
| 2021 | Shi, X. [16]     | G                 | - / - / - / -<br>(- / - / - / -)                                                                              | n.p.                                                                                                         | - / - / - / -<br>(- / - / - / -)                                                                             | n.p.                                                                                                        |
|      |                  | Ch                |                                                                                                               |                                                                                                              | - / - / - / -                                                                                                |                                                                                                             |

|             |               |   |                                                  |                                             |                                          |                                        |
|-------------|---------------|---|--------------------------------------------------|---------------------------------------------|------------------------------------------|----------------------------------------|
|             |               |   | 13.6 (2) / - / - / -<br>(26.9 / - / - / -)       |                                             | (- / - / - / -)                          |                                        |
| 2021        | Pang, Y. [18] | P | 21.4 (26) / - / - / -<br>(- / - / - / -)         | 4.8 (19) / - / - / -<br>(- / - / - / -)     | 21.4 (26) / 8.6 (45) / - # / 8.4<br>(77) | 4.8 (19) / 2.7 (23) / -# / 2.8<br>(33) |
| <b>2021</b> | Kuten, J.     | G | 15.9 (10) / 4.3 (2) / - / -<br>(3.2 / - / - / -) | 5.5 / 7.9 (2) / - / -<br>(11.9 / - / - / -) | -                                        | -                                      |

- not reported for the diseases of interest separately

*n.p. analyses not performed in the study*

\* Patient-wise SUVmax of 9.9 versus lesion-wise SUVmax of 8.7 may concern a typo in the original manuscript.
